# Supplementary material
Source: PubMed Central journal article supplement (PMC5669350)

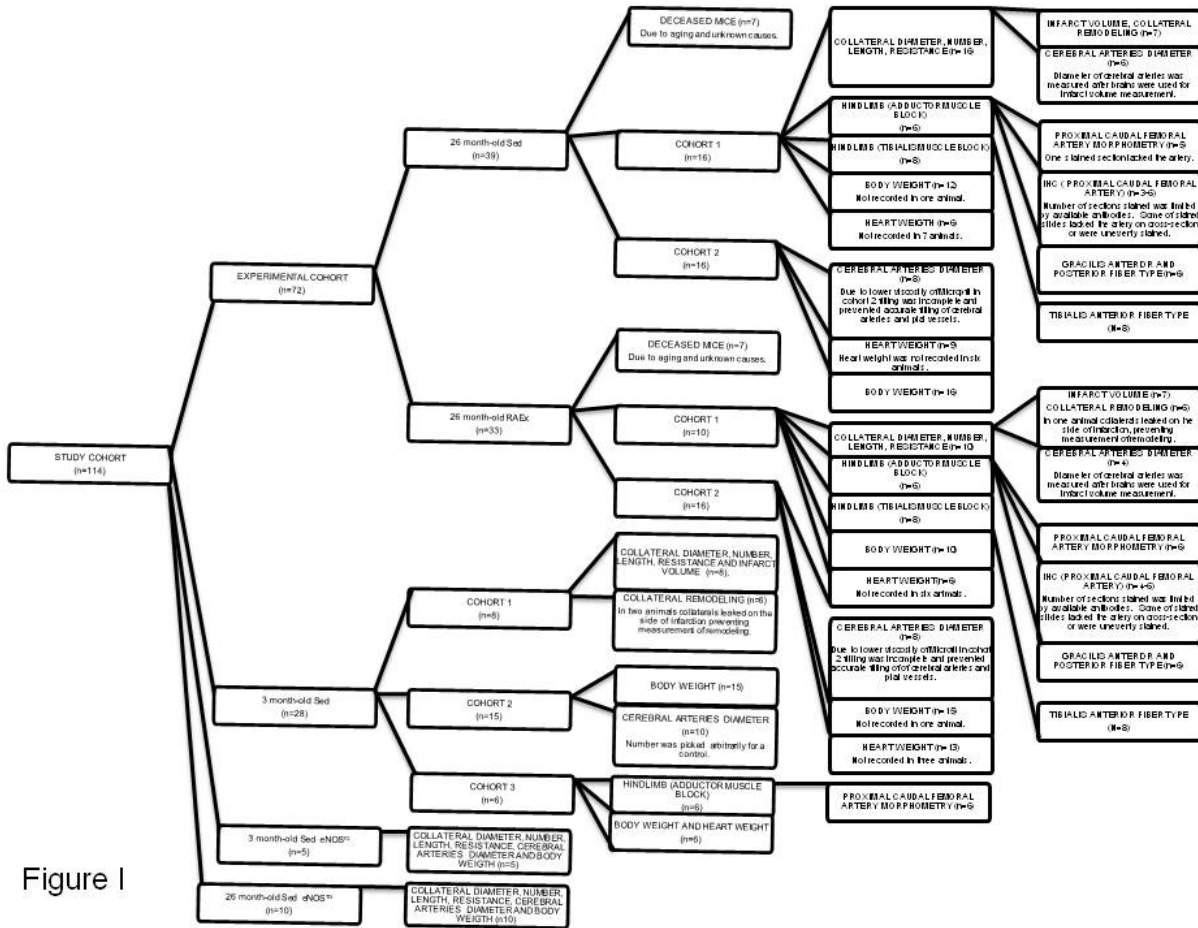

Figure 1

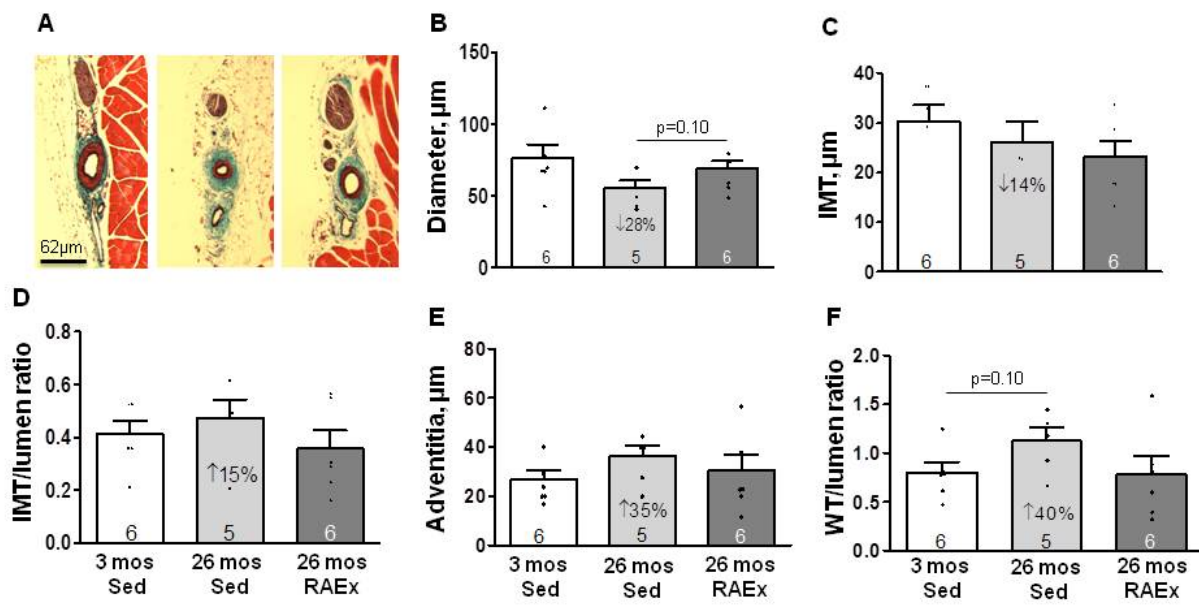

Figure II

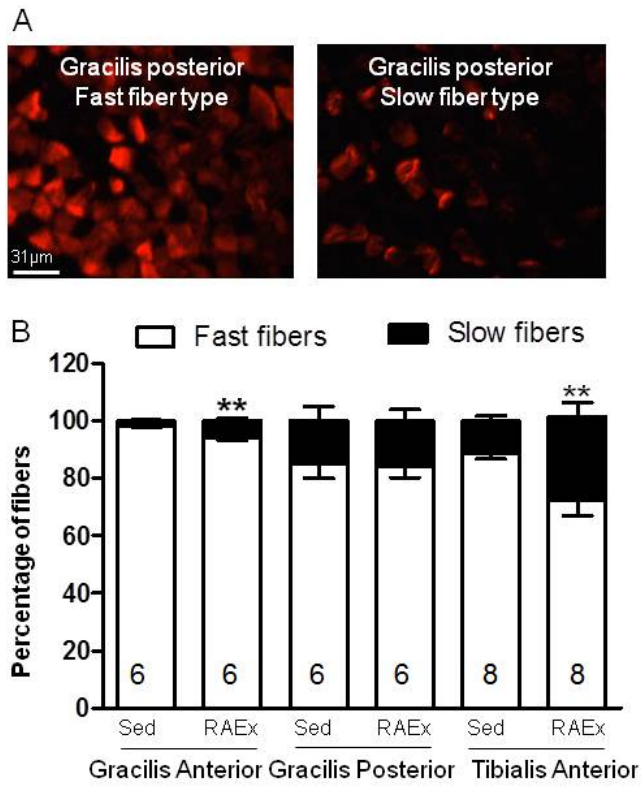

**Figure III**

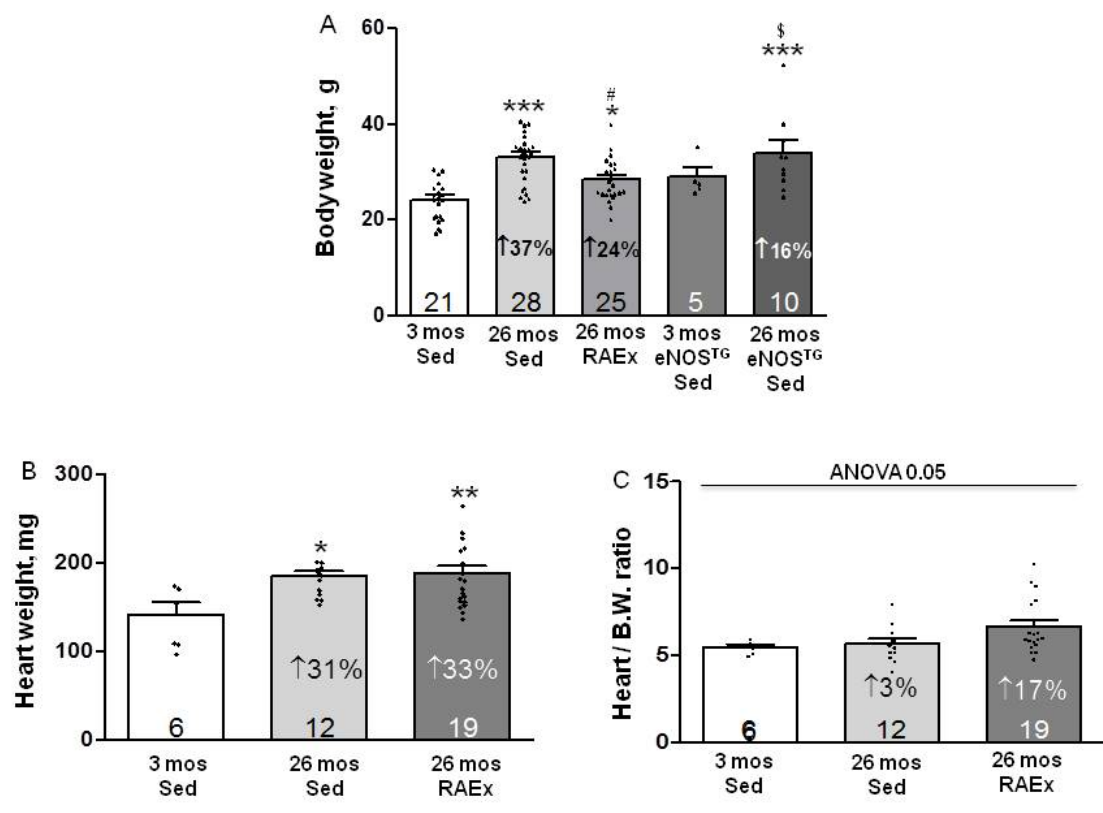

Figure IV

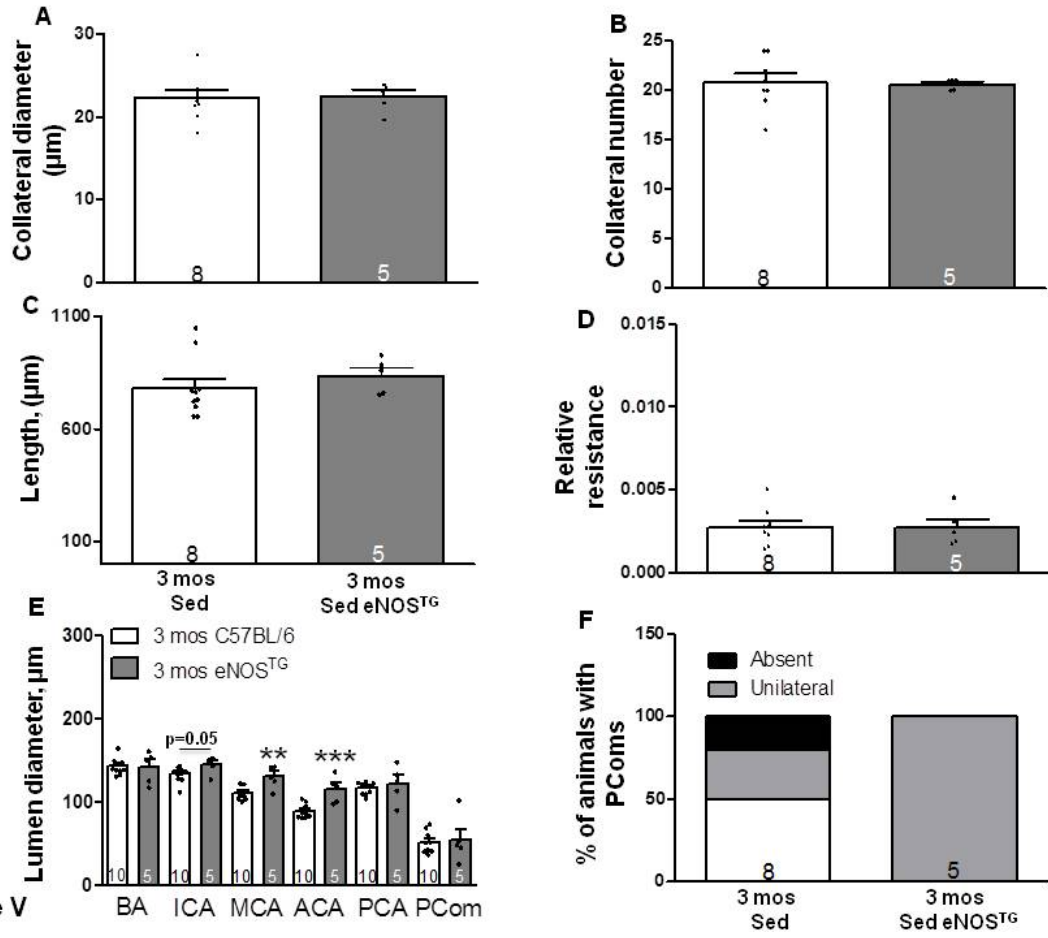

Figure V

Supplement: supplementary_figures_966.pdf [file supplementary_figures_966.pdf]
